# Supplementary material for: Protective potential of glucagon like peptide 2 (GLP-2) against the neurodegeneration
Source: PubMed Central journal article supplement — Neural Regen Res. 2019 Nov;14(11):1901–2. doi: 10.4103/1673-5374.259612 (PMC6676866; doi:10.4103/1673-5374.259612), 2019-11
Supplement: NRR-14-1901_Suppl1.pdf [file NRR-14-1901_Suppl1.pdf]

## OPEN PEER REVIEW REPORT 1

**Name of journal:** Neural Regeneration Research

**Manuscript NO:** NRR-D-19-00071

**Title:** Protective potential of glucagon like peptide 2 (GLP-2) against the neurodegeneration.

**Reviewer's Name:** Sandra I. Mota

**Reviewer's country:** Portugal

**Date sent for review:** 2019-02-19

**Date reviewed:** 2019-02-27

**Review time:** 8 days

### COMMENTS TO AUTHORS

The article is a review paper that summarizes the role of GLP-2 as neuroprotector in neurodegeneration. Article is short which may be justified by the fact that there is few papers about this subject, but it is well written and easy to read and understand. Information is clear and precise which make it a pleasant lecture. However, I recommend minor revisions:

1- page 3, line 33, authors affirm "upregulation of GLP-2R expression can rescue the cognitive impairment induced by CCH". Please add the reference

2- the figure proposed at the end of the manuscript is never cited within the text. Please insert figure citation.
